# Supplementary material for: Monitoring production processes of pharmaceuticals and farm chemicals with near-infrared spectroscopy coupled with the interaction moving window partial least squares method
Source: Royal Society of Chemistry journal article supplement (doi:10.1039/d5ay01996f), 2026-01-01
Supplement: d5ay01996f1.pdf [file d5ay01996f1.pdf]

Supplementary materials

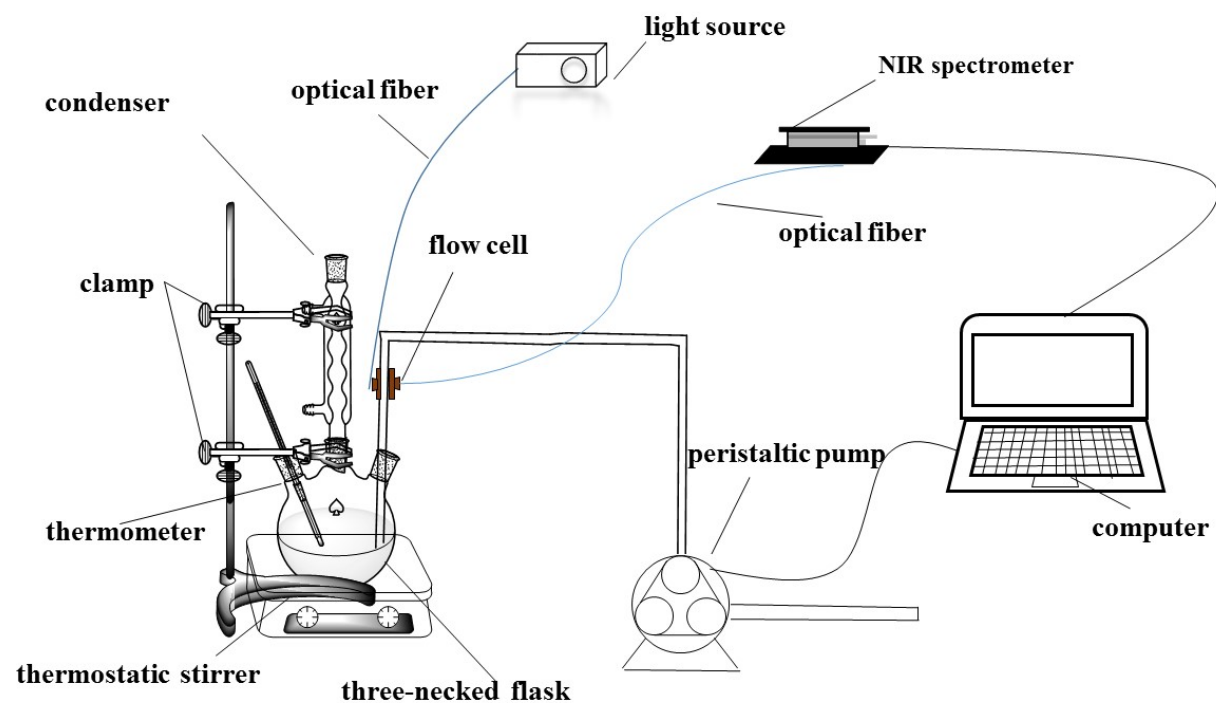

Fig. S1 Schemes of the experimental setups for aspirin synthesis and spectral measurement

Fig. S2 Schemes of the experimental setups for spectral collection during purification process in DCAP production

Fig. S3 Scattering plots of predicted concentration vs real concentration of Aspirin dataset with wavelength selection method of (A) CARS, (B) fiPLS and (C) MC-UVE

Fig. S4 Scattering plots of predicted concentration vs real concentration of DCAP dataset with wavelength selection method of (A) CARS, (B) fiPLS and (C) MC-UVE
